# Supplementary material for: Molecular and serological dynamics of Chlamydia pecorum infection in a longitudinal study of prime lamb production
Source: PeerJ. 2018 Jan 25;6:e4296. doi: 10.7717/peerj.4296 (PMC5787346; doi:10.7717/peerj.4296)
Supplement: Supplemental Information 1 — (S1) qPCR load and CFT titre over time for lambs. (S2) qPCR and CFT detection over time for lambs. (S3) Lag calculations between qPCR and CFT detections for lambs. [file peerj-06-4296-s001.xlsx]

## Sheet: Table S1 qPCR CFT agreement
			2months					4months					6months					8months					10months					clearance	qPCR+CFT+	qPCR+CFT-	qPCR-CFT+	qPCR-CFT-	Eye+	rectum+	vagina+
Sl no	Id	Sex	ConjLoad	VagLoad	RectLoad	Overall PCR load	SeroTitre	ConjLoad	VagLoad	RectLoad	Overall PCR load	SeroTitre	Conjload	Vagload	Rectload	Overall PCR load	SeroTitre	ConjLoad	VagLoad	RectLoad	Overall PCR load	SeroTitre	ConjLoad	VagLoad	RectLoad	Overall PCR load	SeroTitre
1	B5	M	0	NA	0	0	16	0	NA	0	0	8	0	NA	0	0	16	0	NA	0	0	64	0	NA	0	0	8				1
2	B7	F	0	0	0	0	8	0	0	0	0	8	0	164	0	164	64	0	0	0	0	32	0	0	0	0	32	1	1						1
3	B8	F	0	0	0	0	8	0	0	0	0	8	177	1000	13	177, 1000, 13	32	0	0	0	0	32	0	0	0	0	8	1	1				1	1	1
4	B9	M	0	NA	0	0	8	0	NA	0	0	8	0	NA	0	0	32	0	NA	0	0	64	0	NA	0	0	8				1
5	B10	F	0	0	0	0	8	0	0	0	0	8		3884	0	3884	32	0	0	0	0	32	0	0	0	0	8	1	1						1
6	B21	M	0	NA	0	0	8	0	NA	0	0	8	348	NA	0	348	8	0	NA	0	0	64	0	NA	0	0	8	1	1				1
7	B23	M	0	NA	0	0	8	0	NA	0	0	8	0	NA	0	0	8	0	NA	0	0	8	0	NA	0	0	8					1
8	B24	M	0	NA	0	0	8	0	NA	0	0	8	183	NA	0	183	32	0	NA	0	0	8	0	NA	0	0	8	1	1				1
9	B25	M	0	NA	0	0	8	0	NA	0	0	8	0	NA	0	0	128	0	NA	0	0	8	0	NA	0	0	64				1
10	B27	M	0	NA	0	0	8	0	NA	0	0	8	0	NA	0	0	8	0	NA	0	0	8	0	NA	24	24	8			1				1
11	B28	F	0	0	0	0	16	0	0	0	0	8	0	0	0	0	32	0	0	0	0	16	0	0	0	0	8				1
12	B29	F	0	79	0	0	8	0	0	0	0	8	0	0	0	0	8	0	79	0	79	16	0	0	0	0	64	1	1						1
13	B30	M	0	NA	0	0	8	0	NA	0	0	8	0	NA	0	0	16	0	NA	0	0	32	0	NA	0	0	8				1
14	B32	F	0	0	48	48	8	0	0	0	0	8	0	0	9354	9354	8	0	0	0	0	32	0	0	0	0	8	1	1					1
15	B33	M	0	NA	0	0	8	0	NA	0	0	8	0	NA	0	0	32	0	NA	0	0	32	0	NA	0	0	8				1
16	B35	M	0	NA	0	0	8	10	NA	0	10	8	0	NA	0	0	8	0	NA	0	0	64	0	NA	0	0	8	1	1				1
17	B36	F	0	0	0	0	8	46	0	0	46	8	0	0	276	276	8	0	0	0	0	16	0	0	0	0	32	1	1				1	1
18	B38	F	0	0	0	0	8	0	0	0	0	8	10	0	0	10	32	0	0	0	0	64	0	0	0	0	8	1	1				1
19	B39	M	0	NA	76	76	8	0	NA	0	0	8	0	NA	0	0	16	0	NA	0	0	64	0	NA	0	0	32	1	1					1
20	B40	F	0	0	0	0	8	0	0	0	0	8	0	0	0	0	32	0	0	0	0	64	0	0	0	0	8				1
21	B42	F	0	0	0	0	8	0	0	0	0	8	30	0	0	30	128	0	0	0	0	16	0	0	0	0	8	1	1				1
22	B43	F	0	0	0	0	8	0	15	0	15	8	0	0	0	0	8	0	0	0	0	16	10	0	0	10	16		1				1		1
23	B44	M	0	NA	0	0	8	0	NA	0	0	8	0	NA	0	0	8	0	NA	0	0	32	0	NA	0	0	8				1
24	B45	M	0	NA	0	0	8	24	NA	0	24	8	0	NA	0	0	32	0	NA	0	0	32	0	NA	0	0	8	1	1				1
25	Or35	M	0	NA	29	29	8	34	NA	1258	34, 1258	8	0	NA	0	0	8	0	NA	0	0	8	0	NA	0	0	8			1^			1	1
26	Or36	M	0	NA	0	0	8	0	NA	0	0	8	0	NA	0	0	8	54	NA	0	54	32	0	NA	0	0	16		1				1
27	Or37	F	0	0	0	0	8	0	0	0	0	8	0	0	18	18	32	0	0	0	0	16	0	0	0	0	128	1	1					1
28	Or38	M	0	NA	0	0	8	12	NA	0	12	8	0	NA	1048	1048	32	0	NA	0	0	64	0	NA	0	0	8	1	1				1	1
29	Or39	F	0	0	0	0	8	0	0	0	0	8	0	0	0	0	8	0	0	0	0	16	0	0	0	0	8				1
30	Or40	M	0	NA	0	0	8	0	NA	0	0	8	13	NA	0	13	64	0	NA	0	0	32	0	NA	0	0	8	1	1				1
31	Or41	M	0	NA	0	0	8	17	NA	0	17	8	0	NA	0	0	8	0	NA	0	0	32	0	NA	0	0	8	1	1				1
32	Or43	M	0	NA	0	0	16	0	NA	0	0	8	0	NA	0	0	32	0	NA	0	0	32	0	NA	0	0	8				1
33	Or44	F	0	0	0	0	8	0	0	0	0	8	0	0	0	0	8	527	0	0	527	32	0	0	0	0	128	1	1				1
34	B46	M	0	NA	0	0	8	0	NA	0	0	8	0	NA	163	163	32	0	NA	0	0	64	0	NA	0	0	8	1	1					1
35	B47	F	0	0	0	0	16	0	0	0	0	8	0	0	0	0	8	0	0	0	0	64	0	1147	0	1147	64		1						1
36	B48	F	0	0	0	0	16	0	0	0	0	8	0	4917	0	4917	128	0	0	0	0	32	0	0	0	0	8	1	1						1
37	B49	F	0	11	0	0	8	0	0	0	0	8	0	0	0	0	8	0	11	0	11	8	19	0	0	19	16		1				1		1
38	B50	F	0	0	0	0	8	0	0	0	0	8	0	0	0	0	64	0	0	0	0	32	0	0	0	0	64				1
39	B51	F	0	0	1000	1000	32	0	0	0	0	8	0	0	507	507	32	0	0	0	0	32	0	0	0	0	8	1	1					1^
40	B52	F	0	0	0	0	8	0	0	0	0	8	0	110	52877	110, 52877	16	0	0	0	0	32	0	0	0	0	8	1	1					1	1
41	B53	F	0	0	0	0	8	0	0	0	0	8	0	0	0	0	8	0	0	112	112	32	0	0	0	0	16	1	1					1
42	B56	F	0	0	0	0	8	0	0	0	0	8	0	989	0	989	64	0	0	0	0	64	0	0	0	0	16	1	1						1
43	B57	F	0	0	0	0	8	0	0	0	0	8	0	50	0	50	64	0	0	0	0	8	16	0	0	16	16		1				1		1
44	B59	F	0	0	0	0	16	0	0	0	0	8	70	0	312	70, 312	32	0	0	0	0	32	15	0	0	15	8		1				1^	1
45	B61	M	0	NA	0	0	8	0	NA	0	0	8	41	NA	0	41	64	0	NA	0	0	16	0	NA	0	0	8	1	1				1
46	B62	M	0	NA	0	0	8	0	NA	0	0	8	0	NA	0	0	16	0	NA	0	0	16	84	NA	0	84	8		1*				1
47	B64	F	0	0	0	0	16	0	0	0	0	8	0	0	0	0	8	0	0	0	0	16	0	0	0	0	32				1
48	B65	M	0	NA	0	0	8	0	NA	0	0	8	0	NA	0	0	8	0	NA	0	0	8	0	NA	0	0	8					1
49	B66	M	0	NA	0	0	8	0	NA	0	0	8	0	NA	0	0	8	0	NA	0	0	16	0	NA	0	0	8				1
50	B67	M	0	NA	0	0	8	0	NA	0	0	8	0	NA	0	0	8	0	NA	115	115	16	0	NA	0	0	8	1	1					1
51	B69	F	0	0	0	0	8	0	0	0	0	8	0	0	0	0	8	0	0	0	0	32	0	0	0	0	8				1
52	B73	F	0	0	0	0	16	0	0	0	0	8	0	0	0	0	8	0	0	0	0	64	0	0	0	0	8				1
53	B74	M	0	NA	0	0	8	0	NA	0	0	8	0	NA	0	0	8	0	NA	0	0	8	0	NA	0	0	8					1
54	B75	F	0	0	0	0	8	0	0	0	0	8	0	118	0	118	8	0	0	0	0	32	0	0	0	0	64	1	1						1
55	B76	M	0	NA	0	0	8	0	NA	0	0	8	0	NA	0	0	16	0	NA	0	0	32	0	NA	0	0	64				1
56	B77	F	0	281	0	0	8	0	0	0	0	8	0	0	0	0	8	68	281	0	68, 281	8	36	0	0	36	8			1^			1^		1
57	B78	F	0	0	0	0	8	28	0	0	28	8	0	0	0	0	8	15	0	0	15	64	0	0	0	0	8	1	1				1^
58	B79	F	0	0	0	0	8	0	0	0	0	8	0	0	0	0	32	0	0	0	0	16	14	0	0	14	8		1*				1
59	B80	M	0	NA	0	0	8	0	NA	0	0	8	106	NA	0	106	64	56	NA	0	56	64	0	NA	0	0	8	1	1				1^
60	B81	M	0	NA	0	0	8	794	NA	74	794, 74	8	0	NA	0	0	32	0	NA	0	0	32	0	NA	0	0	8	1	1				1	1
61	B83	F	0	0	0	0	8	14	0	0	14	8	0	0	0	0	8	0	0	0	0	16	0	0	0	0	16	1	1				1
62	B84	M	0	NA	87	87	8	14	NA	0	14	8	0	NA	0	0	64	0	NA	0	0	64	0	NA	0	0	32	1	1				1	1
63	B85	F	0	0	0	0	8	0	0	0	0	8	0	1000	0	1000	32	0	0	0	0	8	11	0	0	11	8		1				1		1
64	B88	F	0	0	0	0	8	0	0	14	14	8	36	0	0	36	32	0	0	0	0	64	0	0	0	0	8	1	1				1	1
65	B89	F	0	0	0	0	8	0	0	0	0	8	0	0	0	0	8	0	0	0	0	64	0	1908	0	1908	8		1*						1
66	Or82	M	0	NA	0	0	8	0	NA	0	0	8	0	NA	0	0	16	0	NA	0	0	64	0	NA	0	0	8				1
67	Or83	M	0	NA	0	0	8	0	NA	0	0	8	0	NA	0	0	8	0	NA	0	0	64	84	NA	0	84	32		1				1
68	Or86	F	0	0	0	0	8	0	0	100	100	8	0	0	0	0	8	0	0	20	20	64	0	0	0	0	8	1	1					1^
69	Or87	M	0	NA	0	0	8	0	NA	0	0	8	0	NA	0	0	16	0	NA	0	0	8	0	NA	0	0	8				1
70	Or88	M	1000	NA	0	1000	8	12	NA	0	12	8	0	NA	0	0	64	0	NA	0	0	32	0	NA	0	0	8	1	1					1^
71	Or89	M	11	NA	0	11	32	0	NA	0	0	32	0	NA	0	0	32	0	NA	0	0	8	0	NA	0	0	16	1	1					1
72	Or51	F	0	0	0	0	8	0	0	0	0	8	0	7448	0	7448	64	0	1417	0	1417	8	0	0	0	0	16	1	1						1^
73	Or52	F	0	0	0	0	8	0	21	0	21	8	0	1000	0	1000	32	0	718	0	718	32	0	0	0	0	16	1	1						1^
74	Or53	M	0	NA	0	0	8	21	NA	0	21	8	0	NA	0	0	64	0	NA	0	0	64	0	NA	0	0	32	1	1				1
75	Or54	M	0	NA	0	0	8	0	NA	0	0	8	0	NA	0	0	32	0	NA	0	0	32	0	NA	0	0	8				1
76	Or55	F	1000	0	0	1000	8	0	0	0	0	8	0	0	0	0	32	0	0	0	0	32	0	0	0	0	8	1	1				1
																							^Repeated PCR pos with no CFT antibodies				Total	40	51	3	19	3	32 (4#)	20 (3#)	17 (2#)
																							*CFT antibodies arise before qPCR positivity				%	52.6	67.1	3.9	25	3.9	42.1	26.3	22.3
																					#Repeated positivity						Female	23
																											Male	17
																						qPCR pos
																						CFT pos

## Sheet: Table S2 first detections 
																												New infections
			2months					4months					6months					8months					10months					2 months				4 months				6 months				8 months				10 months				Lag
Sl no	Id	Sex	ConjLoad	VagLoad	RectLoad	Overall PCR load	SeroTitre	ConjLoad	VagLoad	RectLoad	Overall PCR load	SeroTitre	Conjload	Vagload	Rectload	Overall PCR load	SeroTitre	ConjLoad	VagLoad	RectLoad	Overall PCR load	SeroTitre	ConjLoad	VagLoad	RectLoad	Overall PCR load	SeroTitre	eye	rectum	vagina	CFT	eye	rectum	vagina	CFT	eye	rectum	vagina	CFT	eye	rectum	vagina	CFT	eye	rectum	vagina	CFT
1	B5	M	0	NA	0	0	16	0	NA	0	0	8	0	NA	0	0	16	0	NA	0	0	64	0	NA	0	0	8	0	0	0	1#	0	0	0	0	0	0	0	0	0	0	0	0	0	0	0	0
2	B7	F	0	0	0	0	8	0	0	0	0	8	0	164	0	164	64	0	0	0	0	32	0	0	0	0	32	0	0	0	0	0	0	0	0	0	0	1	1^	0	0	0	0	0	0	0	0	0
3	B8	F	0	0	0	0	8	0	0	0	0	8	177	1000	13	177, 1000, 13	32	0	0	0	0	32	0	0	0	0	8	0	0	0	0	0	0	0	0	1	1	1	1^	0	0	0	0	0	0	0	0	0
4	B9	M	0	NA	0	0	8	0	NA	0	0	8	0	NA	0	0	32	0	NA	0	0	64	0	NA	0	0	8	0	0	0	0	0	0	0	0	0	0	0	1#	0	0	0	0	0	0	0	0
5	B10	F	0	0	0	0	8	0	0	0	0	8		3884	0	3884	32	0	0	0	0	32	0	0	0	0	8	0	0	0	0	0	0	0	0	0	0	1	1^	0	0	0	0	0	0	0	0	0
6	B21	M	0	NA	0	0	8	0	NA	0	0	8	348	NA	0	348	8	0	NA	0	0	64	0	NA	0	0	8	0	0	0	0	0	0	0	0	1	0	0	0	0	0	0	0	0	0	0	0	2
7	B23	M	0	NA	0	0	8	0	NA	0	0	8	0	NA	0	0	8	0	NA	0	0	8	0	NA	0	0	8	0	0	0	0	0	0	0	0	0	0	0	0	0	0	0	0	0	0	0	0
8	B24	M	0	NA	0	0	8	0	NA	0	0	8	183	NA	0	183	32	0	NA	0	0	8	0	NA	0	0	8	0	0	0	0	0	0	0	0	1	0	0	1^	0	0	0	0	0	0	0	0	0
9	B25	M	0	NA	0	0	8	0	NA	0	0	8	0	NA	0	0	128	0	NA	0	0	8	0	NA	0	0	64	0	0	0	0	0	0	0	0	0	0	0	0	0	0	0	0	0	0	0	0
10	B27	M	0	NA	0	0	8	0	NA	0	0	8	0	NA	0	0	8	0	NA	0	0	8	0	NA	24	24	8	0	0	0	0	0	0	0	0	0	0	0	0	0	0	0	0	0	1	0	0
11	B28	F	0	0	0	0	16	0	0	0	0	8	0	0	0	0	32	0	0	0	0	16	0	0	0	0	8	0	0	0	1#	0	0	0	0	0	0	0	0	0	0	0	0	0	0	0	0
12	B29	F	0	79	0	79	8	0	0	0	0	8	0	0	0	0	8	0	79	0	79	16	0	0	0	0	64	0	0	1	0	0	0	0	0	0	0	0	0	0	0	1	1^	0	0	0	0	6
13	B30	M	0	NA	0	0	8	0	NA	0	0	8	0	NA	0	0	16	0	NA	0	0	32	0	NA	0	0	8	0	0	0	0	0	0	0	0	0	0	0	0	0	0	0	0	0	0	0	0
14	B32	F	0	0	48	48	8	0	0	0	0	8	0	0	9354	9354	8	0	0	0	0	32	0	0	0	0	8	0	1	0	0	0	0	0	0	0	0	0	0	0	0	0	1*	0	0	0	0	6
15	B33	M	0	NA	0	0	8	0	NA	0	0	8	0	NA	0	0	32	0	NA	0	0	32	0	NA	0	0	8	0	0	0	0	0	0	0	0	0	0	0	1#	0	0	0	0	0	0	0	0
16	B35	M	0	NA	0	0	8	10	NA	0	10	8	0	NA	0	0	8	0	NA	0	0	64	0	NA	0	0	8	0	0	0	0	1	0	0	0	0	0	0	0	0	0	0	1*	0	0	0	0	4
17	B36	F	0	0	0	0	8	46	0	0	46	8	0	0	276	276	8	0	0	0	0	16	0	0	0	0	32	0	0	0	0	1	0	0	0	0	0	0	0	0	0	0	1*	0	0	0	0	4
18	B38	F	0	0	0	0	8	0	0	0	0	8	10	0	0	10	32	0	0	0	0	64	0	0	0	0	8	0	0	0	0	0	0	0	0	1	0	0	1^	0	0	0	0	0	0	0	0	0
19	B39	M	0	NA	76	76	8	0	NA	0	0	8	0	NA	0	0	16	0	NA	0	0	64	0	NA	0	0	32	0	1	0	0	0	0	0	0	0	0	0	1*	0	0	0	0	0	0	0	0	4
20	B40	F	0	0	0	0	8	0	0	0	0	8	0	0	0	0	32	0	0	0	0	64	0	0	0	0	8	0	0	0	0	0	0	0	0	0	0	0	1#	0	0	0	0	0	0	0	0
21	B42	F	0	0	0	0	8	0	0	0	0	8	30	0	0	30	128	0	0	0	0	16	0	0	0	0	8	0	0	0	0	0	0	0	0	1	0	0	1^	0	0	0	0	0	0	0	0	0
22	B43	F	0	0	0	0	8	0	15	0	15	8	0	0	0	0	8	0	0	0	0	16	10	0	0	10	16	0	0	0	0	0	0	1	0	0	0	0	0	0	0	0	1*	1	0	0	0	4
23	B44	M	0	NA	0	0	8	0	NA	0	0	8	0	NA	0	0	8	0	NA	0	0	32	0	NA	0	0	8	0	0	0	0	0	0	0	0	0	0	0	0	0	0	0	1#	0	0	0	0
24	B45	M	0	NA	0	0	8	24	NA	0	24	8	0	NA	0	0	32	0	NA	0	0	32	0	NA	0	0	8	0	0	0	0	1	0	0	0	0	0	0	1*	0	0	0	0	0	0	0	0	2
25	Or35	M	0	NA	29	29	8	34	NA	1258	34, 1258	8	0	NA	0	0	8	0	NA	0	0	8	0	NA	0	0	8	0	1	0	0	0	0	0	0	0	0	0	0	0	0	0	0	0	0	0	0
26	Or36	M	0	NA	0	0	8	0	NA	0	0	8	0	NA	0	0	8	54	NA	0	54	32	0	NA	0	0	16	0	0	0	0	0	0	0	0	0	0	0	0	1	0	0	1^	0	0	0	0	0
27	Or37	F	0	0	0	0	8	0	0	0	0	8	0	0	18	18	32	0	0	0	0	16	0	0	0	0	128	0	0	0	0	0	0	0	0	0	1	0	1^	0	0	0	0	0	0	0	0	0
28	Or38	M	0	NA	0	0	8	12	NA	0	12	8	0	NA	1048	1048	32	0	NA	0	0	64	0	NA	0	0	8	0	0	0	0	1	0	0	0	0	0	0	1*	0	0	0	0	0	0	0	0	2
29	Or39	F	0	0	0	0	8	0	0	0	0	8	0	0	0	0	8	0	0	0	0	16	0	0	0	0	8	0	0	0	0	0	0	0	0	0	0	0	0	0	0	0	1#	0	0	0	0
30	Or40	M	0	NA	0	0	8	0	NA	0	0	8	13	NA	0	13	64	0	NA	0	0	32	0	NA	0	0	8	0	0	0	0	0	0	0	0	1	0	0	1^	0	0	0	0	0	0	0	0	0
31	Or41	M	0	NA	0	0	8	17	NA	0	17	8	0	NA	0	0	8	0	NA	0	0	32	0	NA	0	0	8	0	0	0	0	1	0	0	0	0	0	0	0	0	0	0	1*	0	0	0	0	4
32	Or43	M	0	NA	0	0	16	0	NA	0	0	8	0	NA	0	0	32	0	NA	0	0	32	0	NA	0	0	8	0	0	0	1#	0	0	0	0	0	0	0	0	0	0	0	0	0	0	0	0
33	Or44	F	0	0	0	0	8	0	0	0	0	8	0	0	0	0	8	527	0	0	527	32	0	0	0	0	128	0	0	0	0	0	0	0	0	0	0	0	0	1	0	0	1^	0	0	0	0	0
34	B46	M	0	NA	0	0	8	0	NA	0	0	8	0	NA	163	163	32	0	NA	0	0	64	0	NA	0	0	8	0	0	0	0	0	0	0	0	0	1	0	1^	0	0	0	0	0	0	0	0	0
35	B47	F	0	0	0	0	16	0	0	0	0	8	0	0	0	0	8	0	0	0	0	64	0	1147	0	1147	64	0	0	0	1#	0	0	0	0	0	0	0	0	0	0	0	0	0	0	1	0	0
36	B48	F	0	0	0	0	16	0	0	0	0	8	0	4917	0	4917	128	0	0	0	0	32	0	0	0	0	8	0	0	0	1#	0	0	0	0	0	0	1	0	0	0	0	0	0	0	0	0	0
37	B49	F	0	11	0	11	8	0	0	0	0	8	0	0	0	0	8	0	11	0	11	8	19	0	0	19	16	0	0	1	0	0	0	0	0	0	0	0	0	0	0	1	0	1	0	0	1^	8
38	B50	F	0	0	0	0	8	0	0	0	0	8	0	0	0	0	64	0	0	0	0	32	0	0	0	0	64	0	0	0	0	0	0	0	0	0	0	0	1#	0	0	0	0	0	0	0	0
39	B51	F	0	0	1000	1000	32	0	0	0	0	8	0	0	507	507	32	0	0	0	0	32	0	0	0	0	8	0	1	0	1^	0	0	0	0	0	0	0	0	0	0	0	0	0	0	0	0	0
40	B52	F	0	0	0	0	8	0	0	0	0	8	0	110	52877	110, 52877	16	0	0	0	0	32	0	0	0	0	8	0	0	0	0	0	0	0	0	0	1	1	1^	0	0	0	0	0	0	0	0	0
41	B53	F	0	0	0	0	8	0	0	0	0	8	0	0	0	0	8	0	0	112	112	32	0	0	0	0	16	0	0	0	0	0	0	0	0	0	0	0	0	0	1	0	1^	0	0	0	0	0
42	B56	F	0	0	0	0	8	0	0	0	0	8	0	989	0	989	64	0	0	0	0	64	0	0	0	0	16	0	0	0	0	0	0	0	0	0	0	1	1^	0	0	0	0	0	0	0	0	0
43	B57	F	0	0	0	0	8	0	0	0	0	8	0	50	0	50	64	0	0	0	0	8	16	0	0	16	16	0	0	0	0	0	0	0	0	0	0	1	1^	0	0	0	0	1	0	0	0	0
44	B59	F	0	0	0	0	16	0	0	0	0	8	70	0	312	70, 312	32	0	0	0	0	32	15	0	0	15	8	0	0	0	1#	0	0	0	0	1	1	0	0	0	0	0	0	0	0	0	0
45	B61	M	0	NA	0	0	8	0	NA	0	0	8	41	NA	0	41	64	0	NA	0	0	16	0	NA	0	0	8	0	0	0	0	0	0	0	0	1	0	0	1^	0	0	0	0	0	0	0	0	0
46	B62	M	0	NA	0	0	8	0	NA	0	0	8	0	NA	0	0	16	0	NA	0	0	16	84	NA	0	84	8	0	0	0	0	0	0	0	0	0	0	0	1#	0	0	0	0	1	0	0	0
47	B64	F	0	0	0	0	16	0	0	0	0	8	0	0	0	0	8	0	0	0	0	16	0	0	0	0	32	0	0	0	1#	0	0	0	0	0	0	0	0	0	0	0	0	0	0	0	0
48	B65	M	0	NA	0	0	8	0	NA	0	0	8	0	NA	0	0	8	0	NA	0	0	8	0	NA	0	0	8	0	0	0	0	0	0	0	0	0	0	0	0	0	0	0	0	0	0	0	0
49	B66	M	0	NA	0	0	8	0	NA	0	0	8	0	NA	0	0	8	0	NA	0	0	16	0	NA	0	0	8	0	0	0	0	0	0	0	0	0	0	0	0	0	0	0	1#	0	0	0	0
50	B67	M	0	NA	0	0	8	0	NA	0	0	8	0	NA	0	0	8	0	NA	115	115	16	0	NA	0	0	8	0	0	0	0	0	0	0	0	0	0	0	0	0	1	0	1^	0	0	0	0	0
51	B69	F	0	0	0	0	8	0	0	0	0	8	0	0	0	0	8	0	0	0	0	32	0	0	0	0	8	0	0	0	0	0	0	0	0	0	0	0	0	0	0	0	1#	0	0	0	0
52	B73	F	0	0	0	0	16	0	0	0	0	8	0	0	0	0	8	0	0	0	0	64	0	0	0	0	8	0	0	0	1#	0	0	0	0	0	0	0	0	0	0	0	0	0	0	0	0
53	B74	M	0	NA	0	0	8	0	NA	0	0	8	0	NA	0	0	8	0	NA	0	0	8	0	NA	0	0	8	0	0	0	0	0	0	0	0	0	0	0	0	0	0	0	0	0	0	0	0
54	B75	F	0	0	0	0	8	0	0	0	0	8	0	118	0	118	8	0	0	0	0	32	0	0	0	0	64	0	0	0	0	0	0	0	0	0	0	1	0	0	0	0	1*	0	0	0	0	2
55	B76	M	0	NA	0	0	8	0	NA	0	0	8	0	NA	0	0	16	0	NA	0	0	32	0	NA	0	0	64	0	0	0	0	0	0	0	0	0	0	0	1#	0	0	0	0	0	0	0	0
56	B77	F	0	281	0	281	8	0	0	0	0	8	0	0	0	0	8	68	281	0	68, 281	8	36	0	0	36	8	0	0	1	0	0	0	0	0	0	0	0	0	1	0	0	0	0	0	0	0
57	B78	F	0	0	0	0	8	28	0	0	28	8	0	0	0	0	8	15	0	0	15	64	0	0	0	0	8	0	0	0	0	1	0	0	0	0	0	0	0	0	0	0	1*	0	0	0	0	4
58	B79	F	0	0	0	0	8	0	0	0	0	8	0	0	0	0	32	0	0	0	0	16	14	0	0	14	8	0	0	0	0	0	0	0	0	0	0	0	0	0	0	0	0	1	0	0	0
59	B80	M	0	NA	0	0	8	0	NA	0	0	8	106	NA	0	106	64	56	NA	0	56	64	0	NA	0	0	8	0	0	0	0	0	0	0	0	1	0	0	1^	0	0	0	0	0	0	0	0	0
60	B81	M	0	NA	0	0	8	794	NA	74	794, 74	8	0	NA	0	0	32	0	NA	0	0	32	0	NA	0	0	8	0	0	0	0	1	0	0	0	0	0	0	0	0	0	0	0	0	0	0	0	2
61	B83	F	0	0	0	0	8	14	0	0	14	8	0	0	0	0	8	0	0	0	0	16	0	0	0	0	16	0	0	0	0	1	0	0	0	0	0	0	0	0	0	0	1*	0	0	0	0	4
62	B84	M	0	NA	87	87	8	14	NA	0	14	8	0	NA	0	0	64	0	NA	0	0	64	0	NA	0	0	32	0	1	0	0	0	0	0	0	0	0	0	0	0	0	0	0	0	0	0	0	4
63	B85	F	0	0	0	0	8	0	0	0	0	8	0	1000	0	1000	32	0	0	0	0	8	11	0	0	11	8	0	0	0	0	0	0	0	0	0	0	1	1^	0	0	0	0	1	0	0	0	0
64	B88	F	0	0	0	0	8	0	0	14	14	8	36	0	0	36	32	0	0	0	0	64	0	0	0	0	8	0	0	0	0	0	1	0	0	1	0	0	1^	0	0	0	0	0	0	0	0	2
65	B89	F	0	0	0	0	8	0	0	0	0	8	0	0	0	0	8	0	0	0	0	64	0	1908	0	1908	8	0	0	0	0	0	0	0	0	0	0	0	0	0	0	0	1#	0	0	1	0
66	Or82	M	0	NA	0	0	8	0	NA	0	0	8	0	NA	0	0	16	0	NA	0	0	64	0	NA	0	0	8	0	0	0	0	0	0	0	0	0	0	0	1#	0	0	0	0	0	0	0	0
67	Or83	M	0	NA	0	0	8	0	NA	0	0	8	0	NA	0	0	8	0	NA	0	0	64	84	NA	0	84	32	0	0	0	0	0	0	0	0	0	0	0	0	0	0	0	1#	1	0	0	0
68	Or86	F	0	0	0	0	8	0	0	100	100	8	0	0	0	0	8	0	0	20	20	64	0	0	0	0	8	0	0	0	0	0	1	0	0	0	0	0	0	0	0	0	1*	0	0	0	0	4
69	Or87	M	0	NA	0	0	8	0	NA	0	0	8	0	NA	0	0	16	0	NA	0	0	8	0	NA	0	0	8	0	0	0	0	0	0	0	0	0	0	0	1#	0	0	0	0	0	0	0	0
70	Or88	M	1000	NA	0	1000	8	12	NA	0	12	8	0	NA	0	0	64	0	NA	0	0	32	0	NA	0	0	8	1	0	0	0	0	0	0	0	0	0	0	1*	0	0	0	0	0	0	0	0	4
71	Or89	M	11	NA	0	11	32	0	NA	0	0	32	0	NA	0	0	32	0	NA	0	0	8	0	NA	0	0	16	1	0	0	1^	0	0	0	0	0	0	0	0	0	0	0	0	0	0	0	0	0
72	Or51	F	0	0	0	0	8	0	0	0	0	8	0	7448	0	7448	64	0	1417	0	1417	8	0	0	0	0	16	0	0	0	0	0	0	0	0	0	0	1	1^	0	0	0	0	0	0	0	0	0
73	Or52	F	0	0	0	0	8	0	21	0	21	8	0	1000	0	1000	32	0	718	0	718	32	0	0	0	0	16	0	0	0	0	0	0	1	0	0	0	0	1*	0	0	0	0	0	0	0	0	2
74	Or53	M	0	NA	0	0	8	21	NA	0	21	8	0	NA	0	0	64	0	NA	0	0	64	0	NA	0	0	32	0	0	0	0	1	0	0	0	0	0	0	0	0	0	0	0	0	0	0	0	2
75	Or54	M	0	NA	0	0	8	0	NA	0	0	8	0	NA	0	0	32	0	NA	0	0	32	0	NA	0	0	8	0	0	0	0	0	0	0	0	0	0	0	0	0	0	0	0	0	0	0	0
76	Or55	F	1000	0	0	1000	8	0	0		0	8	0	0	0	0	32	0	0	0	0	32	0	0	0	0	8	1	0	0	0	0	0	0	0	0	0	0	0	0	0	0	0	0	0	0	0	4
																										qPCR pos	Total	3	5	3	13	9	2	2	0	10	5	10	30	3	2	2	20	7	1	2	1
																										CFT pos
																									^ CFT + due to seroconversion
																									* CFT+ due to lag in seroconversion
																									# CFT+ due to suspected previous exposure

## Sheet: Table S3 Lag
			2months					4months					6months					8months					10months					Lag (months)
Sl no	Id	Sex	ConjLoad	VagLoad	RectLoad	Overall PCR load	SeroTitre	ConjLoad	VagLoad	RectLoad	Overall PCR load	SeroTitre	Conjload	Vagload	Rectload	Overall PCR load	SeroTitre	ConjLoad	VagLoad	RectLoad	Overall PCR load	SeroTitre	ConjLoad	VagLoad	RectLoad	Overall PCR load	SeroTitre
1	B7	F	0	0	0	0	8	0	0	0	0	8	0	164	0	164	64	0	0	0	0	32	0	0	0	0	32	0
2	B8	F	0	0	0	0	8	0	0	0	0	8	177	1000	13	177, 1000, 13	32	0	0	0	0	32	0	0	0	0	8	0
3	B10	F	0	0	0	0	8	0	0	0	0	8		3884	0	3884	32	0	0	0	0	32	0	0	0	0	8	0
4	B21	M	0	NA	0	0	8	0	NA	0	0	8	348	NA	0	348	8	0	NA	0	0	64	0	NA	0	0	8	2
5	B24	M	0	NA	0	0	8	0	NA	0	0	8	183	NA	0	183	32	0	NA	0	0	8	0	NA	0	0	8	0
6	B29	F	0	79	0	79	8	0	0	0	0	8	0	0	0	0	8	0	79	0	79	16	0	0	0	0	64	6
7	B32	F	0	0	48	48	8	0	0	0	0	8	0	0	9354	9354	8	0	0	0	0	32	0	0	0	0	8	6
8	B35	M	0	NA	0	0	8	10	NA	0	10	8	0	NA	0	0	8	0	NA	0	0	64	0	NA	0	0	8	4
9	B36	F	0	0	0	0	8	46	0	0	46	8	0	0	276	276	8	0	0	0	0	16	0	0	0	0	32	4
10	B38	F	0	0	0	0	8	0	0	0	0	8	10	0	0	10	32	0	0	0	0	64	0	0	0	0	8	0
11	B39	M	0	NA	76	76	8	0	NA	0	0	8	0	NA	0	0	16	0	NA	0	0	64	0	NA	0	0	32	4
12	B42	F	0	0	0	0	8	0	0	0	0	8	30	0	0	30	128	0	0	0	0	16	0	0	0	0	8	0
13	B43	F	0	0	0	0	8	0	15	0	15	8	0	0	0	0	8	0	0	0	0	16	10	0	0	10	16	4
14	B45	M	0	NA	0	0	8	24	NA	0	24	8	0	NA	0	0	32	0	NA	0	0	32	0	NA	0	0	8	2
15	Or36	M	0	NA	0	0	8	0	NA	0	0	8	0	NA	0	0	8	54	NA	0	54	32	0	NA	0	0	16	0
16	Or37	F	0	0	0	0	8	0	0	0	0	8	0	0	18	18	32	0	0	0	0	16	0	0	0	0	128	0
17	Or38	M	0	NA	0	0	8	12	NA	0	12	8	0	NA	1048	1048	32	0	NA	0	0	64	0	NA	0	0	8	2
18	Or40	M	0	NA	0	0	8	0	NA	0	0	8	13	NA	0	13	64	0	NA	0	0	32	0	NA	0	0	8	0
19	Or41	M	0	NA	0	0	8	17	NA	0	17	8	0	NA	0	0	8	0	NA	0	0	32	0	NA	0	0	8	4
20	Or44	F	0	0	0	0	8	0	0	0	0	8	0	0	0	0	8	527	0	0	527	32	0	0	0	0	128	0
21	B46	M	0	NA	0	0	8	0	NA	0	0	8	0	NA	163	163	32	0	NA	0	0	64	0	NA	0	0	8	0
22	B47	F	0	0	0	0	16	0	0	0	0	8	0	0	0	0	8	0	0	0	0	64	0	1147	0	1147	64	0
23	B48	F	0	0	0	0	16	0	0	0	0	8	0	4917	0	4917	128	0	0	0	0	32	0	0	0	0	8	0
24	B49	F	0	11	0	11	8	0	0	0	0	8	0	0	0	0	8	0	11	0	11	8	19	0	0	19	16	8
25	B51	F	0	0	1000	1000	32	0	0	0	0	8	0	0	507	507	32	0	0	0	0	32	0	0	0	0	8	0
26	B52	F	0	0	0	0	8	0	0	0	0	8	0	110	52877	110, 52877	16	0	0	0	0	32	0	0	0	0	8	0
27	B53	F	0	0	0	0	8	0	0	0	0	8	0	0	0	0	8	0	0	112	112	32	0	0	0	0	16	0
28	B56	F	0	0	0	0	8	0	0	0	0	8	0	989	0	989	64	0	0	0	0	64	0	0	0	0	16	0
29	B57	F	0	0	0	0	8	0	0	0	0	8	0	50	0	50	64	0	0	0	0	8	16	0	0	16	16	0
30	B61	M	0	NA	0	0	8	0	NA	0	0	8	41	NA	0	41	64	0	NA	0	0	16	0	NA	0	0	8	0
31	B67	M	0	NA	0	0	8	0	NA	0	0	8	0	NA	0	0	8	0	NA	115	115	16	0	NA	0	0	8	0
32	B75	F	0	0	0	0	8	0	0	0	0	8	0	118	0	118	8	0	0	0	0	32	0	0	0	0	64	2
33	B78	F	0	0	0	0	8	28	0	0	28	8	0	0	0	0	8	15	0	0	15	64	0	0	0	0	8	4
34	B80	M	0	NA	0	0	8	0	NA	0	0	8	106	NA	0	106	64	56	NA	0	56	64	0	NA	0	0	8	0
35	B81	M	0	NA	0	0	8	794	NA	74	794, 74	8	0	NA	0	0	32	0	NA	0	0	32	0	NA	0	0	8	2
36	B83	F	0	0	0	0	8	14	0	0	14	8	0	0	0	0	8	0	0	0	0	16	0	0	0	0	16	4
37	B84	M	0	NA	87	87	8	14	NA	0	14	8	0	NA	0	0	64	0	NA	0	0	64	0	NA	0	0	32	4
38	B85	F	0	0	0	0	8	0	0	0	0	8	0	1000	0	1000	32	0	0	0	0	8	11	0	0	11	8	0
39	B88	F	0	0	0	0	8	0	0	14	14	8	36	0	0	36	32	0	0	0	0	64	0	0	0	0	8	2
40	Or86	F	0	0	0	0	8	0	0	100	100	8	0	0	0	0	8	0	0	20	20	64	0	0	0	0	8	4
41	Or88	M	1000	NA	0	1000	8	12	NA	0	12	8	0	NA	0	0	64	0	NA	0	0	32	0	NA	0	0	8	4
42	Or89	M	11	NA	0	11	32	0	NA	0	0	32	0	NA	0	0	32	0	NA	0	0	8	0	NA	0	0	16	0
43	Or51	F	0	0	0	0	8	0	0	0	0	8	0	7448	0	7448	64	0	1417	0	1417	8	0	0	0	0	16	0
44	Or52	F	0	0	0	0	8	0	21	0	21	8	0	1000	0	1000	32	0	718	0	718	32	0	0	0	0	16	2
45	Or53	M	0	NA	0	0	8	21	NA	0	21	8	0	NA	0	0	64	0	NA	0	0	64	0	NA	0	0	32	2
46	Or55	F	1000	0	0	1000	8	0	0	0	0	8	0	0	0	0	32	0	0	0	0	32	0	0	0	0	8	4
																											Avg Lag	1.73913
																											SD	2.1337
